# Supplementary material
Source: PubMed Central journal article supplement (PMC7982932)
Supplement: bmjqs-2019-010405supp001.pdf [file bmjqs-2019-010405supp001.pdf]

## Appendix

This appendix describes in more detail the New Dale-Chall readability formula, the NDC reading level conversion table, and the quality evaluation results mentioned in the paper.

### 1. The New Dale-Chall (NDC) formula

The original NDC readability formula published in 1995 is:[1]

$$\text{Dale - Chall cloze} = 64 - 0.95 \text{ unfamiliar words}^* - 0.69 \text{ average sentence length}$$

\* For sample shorter than 100 words, the number of unfamiliar words should be turned into a percentage.

The formula applied in this paper is:[1,2]

$$\text{NDC cloze score} = 64 - (0.95 \times 100 \times \frac{n_{wd}}{n_d}) - (0.69 \times \text{ASL})$$

- Nwd =  $n_{wd}$  = number of "difficult" words not matching the Dale-Chall list of "easy" words
- Nw =  $n_{wd}$  = number of words
- ASL = Average Sentence Length = number of words / number of sentences
- cloze score: a widely accepted index in the literature for the text readability level. It indicates the percentage of correct fill-ins for the deletion in a text during a cloze test. This test is based on the belief that readers can insert the missing words in the text based on their reading comprehension.[3,4]

### 2. The New Dale-Chall (NDC) reading level conversion table

**Table S1.** Equivalent New Dale-Chall cloze scores and reading levels

| Reading Levels | Cloze Scores (x) |
|----------------|------------------|
| 1              | $x \geq 58$      |
| 2              | $57 \leq x < 54$ |
| 3              | $53 \leq x < 50$ |
| 4              | $49 \leq x < 45$ |
| 5-6            | $44 \leq x < 40$ |
| 7-8            | $39 \leq x < 34$ |
| 9-10           | $33 \leq x < 28$ |
| 11-12          | $27 \leq x < 22$ |
| 13-15          | $21 \leq x < 16$ |
| 16+            | $x \leq 15$      |

Reading levels are the estimated reading ability levels for reading and understanding the text. The lower the reading level, the easier the text. The cloze scores were converted into reading levels

using the above mapping table, ranging from 1 (about first-grade reading level) to 16+ (college graduate level). [1]

### 3. Quality evaluation of patient directions

**Table S2.** Quality evaluation of 966 randomly selected prescription label directions

| Issue category                             | Issues before transcription, N (%) <sup>a</sup> | Issues resolved, N | Issues introduced, N | Issues after transcription, N (%) <sup>a</sup> | P-value (McNemar's test) | Example directions on prescription labels <sup>b</sup> |
|--------------------------------------------|-------------------------------------------------|--------------------|----------------------|------------------------------------------------|--------------------------|--------------------------------------------------------|
| No action verb                             | 279 (28.9)                                      | 273                | 0                    | 6 (0.6)                                        | p < 0.001                | 1 tablet by mouth daily at bedtime                     |
| No dose                                    | 24 (2.5)                                        | 14                 | 1                    | 11 (1.1)                                       | p = 0.002                | use 4 times a day                                      |
| No dose unit                               | 72(7.5)                                         | 61                 | 3                    | 14 (1.4)                                       | p < 0.001                | inject 0.75 subcutaneously once every week             |
| No route                                   | 167 (17.3)                                      | 164                | 11                   | 12 (1.2)                                       | p < 0.001                | take 1 capsule once a day                              |
| No frequency                               | 7 (0.7)                                         | 2                  | 0                    | 5 (0.5)                                        | p = 0.480                | take 1 tablet by mouth as needed with food             |
| “As needed” without indication             | 34 (3.5)                                        | 1                  | 2                    | 35 (3.6)                                       | p = 1.000                | take 1 tablet by mouth twice a day as needed           |
| “As directed” without a qualifier          | 26 (2.7)                                        | 2                  | 16                   | 40 (4.1)                                       | p = 0.002                | use as directed                                        |
| Abbreviations/ Latin words/Medical jargons | 221 (22.9)                                      | 210                | 1                    | 12 (1.2)                                       | p < 0.001                | 1 tab(s) po bid <sup>c</sup>                           |
| <b>Total</b>                               | 849                                             | 727                | 34                   | 157                                            |                          |                                                        |

a) Some prescription label direction may contain more than one issue

b) All the example prescription label direction strings are transcribed to lower cases for easy reading

c) tab(s) = tablets, po = by mouth, bid = twice daily

**Reference**

- 1 KIYOKAWA H, CHALL, J. S. and DALE, E. (1995) Readability Revisited : The New Dale-Chall Readability Formula., Brookline Books. *Japanese J Educ media Res* Published Online First: 1996. doi:10.24458/jaems.3.1\_59
- 2 Benoit K, Watanabe K, Wang H, *et al.* quanteda: An R package for the quantitative analysis of textual data. *J Open Source Softw* 2018;**3**:774. doi:10.21105/joss.00774
- 3 Miller MJ, DeWitt JE, McCleary EM, *et al.* Application of the cloze procedure to evaluate comprehension and demonstrate rewriting of pharmacy educational materials. *Ann Pharmacother* Published Online First: 2009. doi:10.1345/aph.1L642
- 4 Taylor WL. “Cloze Procedure”: A New Tool for Measuring Readability. *Journal Q* Published Online First: 1953. doi:10.1177/107769905303000401
